# Supplementary material
Source: HighWire-hosted journal article supplement (https://erj.ersjournals.com/content/52/3/1800504)
Supplement: inline-supplementary-material-1 [file inline-supplementary-material-1.pdf]

## Online data supplement

### **Title: Does early-onset asthma increase childhood obesity risk? A pooled analysis of 16 European cohorts**

#### **Authors:**

Zuelma A Contreras PhD<sup>1</sup>, Zhanghua Chen PhD<sup>1</sup>, Theano Roumeliotaki MPH<sup>2</sup>, Isabella Annesi-Maesano PhD<sup>3</sup>, Nour Baiz PhD<sup>3</sup>, Andrea von Berg PhD<sup>4</sup>, Anna Bergström PhD<sup>5,6</sup>, Sarah Crozier PhD<sup>7</sup>, Liesbeth Duijts PhD<sup>8,9,10</sup>, Sandra Ekström MSc<sup>5</sup>, Esben Eller PhD<sup>11</sup>, Maria P Fantini MD<sup>12</sup>, Henrik Fomsgaard Kjaer PhD<sup>11</sup>, Francesco Forastiere PhD<sup>13</sup>, Beatrix Gerhard PhD<sup>14</sup>, Davide Gori MD<sup>12</sup>, Margreet W Harskamp-van Ginkel MD<sup>15</sup>, Joachim Heinrich PhD<sup>16,17</sup>, Carmen Iñiguez PhD<sup>18,19,20</sup>, Hazel Inskip PhD<sup>7,21</sup>, Thomas Keil MD<sup>22</sup>, Manolis Kogevinas PhD<sup>20,23-25</sup>, Susanne Lau MD<sup>26</sup>, Irina Lehmann PhD<sup>27</sup>, Dieter Maier PhD<sup>14</sup>, Evelien R van Meel MD<sup>8,9,28</sup>, Monique Mommers PhD<sup>29</sup>, Mario Murcia MSc<sup>19,20</sup>, Daniela Porta MSc<sup>13</sup>, Henriëtte A Smit PhD<sup>30</sup>, Marie Standl PhD<sup>16</sup>, Nikos Stratakis PhD<sup>2,31</sup>, Jordi Sunyer PhD<sup>23</sup>, Carel Thijs PhD<sup>29</sup>, Maties Torrent PhD<sup>32</sup>, Tanja GM Vrijkotte PhD<sup>15</sup>, Alet H Wijga PhD<sup>33</sup>, Kiros Berhane PhD<sup>1</sup>, Frank Gilliland PhD<sup>1</sup>, Leda Chatzi PhD<sup>1,2,31</sup>

**Table E1. Distribution of maternal and child characteristics comparing those excluded due to missing data to those included in our study**

|                          | <b>Excluded at baseline due to missing exposure/outcome information*, n=5,420</b> |                | <b>Total study population at baseline†, n=21,130</b> |                |
|--------------------------|-----------------------------------------------------------------------------------|----------------|------------------------------------------------------|----------------|
|                          | <b>Total n with data</b>                                                          | <b>No. (%)</b> | <b>Total n with data</b>                             | <b>No. (%)</b> |
| Child sex                |                                                                                   |                |                                                      |                |
| male                     | 5420                                                                              | 2806 (51.8)    | 21130                                                | 10791 (51.1)   |
| Maternal education       |                                                                                   |                |                                                      |                |
| low/medium               | 5186                                                                              | 3120 (60.2)    | 19943                                                | 10975 (55.0)   |
| Parity                   |                                                                                   |                |                                                      |                |
| multiparous              | 5281                                                                              | 2508 (47.5)    | 20754                                                | 9819 (47.3)    |
| Birthweight (g)          |                                                                                   |                |                                                      |                |
| median (IQR)             | 5229                                                                              | 3460 (640)     | 20689                                                | 3460 (645)     |
| Breastfeeding            |                                                                                   |                |                                                      |                |
| ≥3 months                | 5063                                                                              | 3195 (63.1)    | 20507                                                | 13874 (67.7)   |
| Parental asthma          |                                                                                   |                |                                                      |                |
| yes                      | 4507                                                                              | 876 (19.4)     | 20519                                                | 3407 (16.6)    |
| Smoking during pregnancy |                                                                                   |                |                                                      |                |
| yes                      | 5304                                                                              | 797 (15.0)     | 20012                                                | 2737 (13.7)    |
| Passive smoke            |                                                                                   |                |                                                      |                |
| yes                      | 5178                                                                              | 1464 (28.3)    | 21096                                                | 5916 (28.0)    |

\*Excluded at baseline due to not having information for at least 1 exposure of interest & BMI information for at least 2 follow-ups

†Total study population after excluding the 5,420 participants with missing exposure/outcome information and 567 prevalent obesity cases

**Table E2. Information on data collection for early-onset asthma and asthma-related phenotypes by cohort**

|          | <b>Asthma diagnosis ever prior to baseline visit</b>                   | <b>Wheeze</b>                                                         | <b>Wheeze in the last 12 months of baseline visit</b> | <b>Allergic rhinitis in the last 12 months of baseline visit</b>        | <b>Medication in the last 12 months of baseline visit</b>                         |
|----------|------------------------------------------------------------------------|-----------------------------------------------------------------------|-------------------------------------------------------|-------------------------------------------------------------------------|-----------------------------------------------------------------------------------|
| ABCD     | Not collected                                                          | Ever wheeze collected at 1y                                           | Not collected                                         | Not collected                                                           | Not collected                                                                     |
| BAMSE    | Ever physician diagnosed asthma collected at 1 y, 2 y, 4 y             | Wheeze in last 12 months collected at 1 y, 2y, 4 y                    | Wheezing in the last 12 months collected at 4 y       | Allergic rhinitis in the last 12 months collected at 4y                 | Treatment for asthma or breathing problems in the last 24 months collected at 4y  |
| DARC     | Not collected                                                          | Wheeze in last 12 months collected at 3m, 6m, 9m, 18m, 3y             | Wheezing in the last 12 months collected at 3 y       | Allergic rhinitis in the last 12 months collected at 3 y                | Treatment for asthma or breathing problems in the last 12 months collected at 3y  |
| EDEN     | Ever physician diagnosed asthma collected at 4y                        | Wheeze in last 12 months collected at 1 y, 2y, 3y, 4 y                | Wheezing in the last 12 months collected at 4y        | Allergic rhinitis in the last 12 months collected at 4 y                | Not collected                                                                     |
| GENR     | Not collected                                                          | Wheeze in last 12 months collected at 2y, 4y                          | Wheeze in the past 12 months at 4 y                   | Not collected                                                           | Not collected                                                                     |
| GINIplus | Ever physician diagnosed asthma collected at 1 y, 2 y, 3 y, 4 y        | Wheeze in last 12 months collected at 1y, 2y, 3y, 4y                  | Wheezing in the last 12 months collected at 4 y       | Allergic rhinitis in the last 12 months collected at 4 y                | Treatment for asthma in the last 12 months collected at 3 y                       |
| INMA_M   | Ever physician diagnosed asthma collected at 2 y, 3 y, 4 y             | Wheeze in last 12 months collected at 1y, 2y, 3y, 4y                  | Wheezing in the last 12 months collected at 4 y       | Not collected                                                           | Not collected                                                                     |
| INMA_V   | Ever physician diagnosed asthma in the last 12 months collected at 4 y | Wheeze in last 12 months collected at 2y, 4y                          | Wheezing in the last 12 months collected at 4 y       | Self-report of allergic rhinitis in the last 12 months collected at 4 y | Medication for wheezing in the last 12 months collected at 4 y                    |
| KOALA    | Doctor diagnosed asthma collected at 4 y                               | Wheeze in last 12 months collected at 2y, 4y                          | Wheeze in the past 12 months collected at 4 y         | Not collected                                                           | Medication in the last 12 months at 4 y                                           |
| LISAplus | Ever physician diagnosed asthma collected at 1 y, 2 y, 3 y, 4 y        | Wheeze in last 12 months collected at 1y, 2y, 4y;                     | Wheezing in the last 12 months collected at 4 y       | Allergic rhinitis in the last 12 months at 4 y                          | Not collected                                                                     |
| MAS      | Not collected                                                          | Wheeze in last 12 months collected at 1y, 2y, 3y, 4y                  | Wheezing in the last 12 months collected at 4 y       | Allergic rhinitis in the last 12 months collected at 4 y                | Not collected                                                                     |
| PIAMA    | Ever physician diagnosed asthma collected at 1 y, 2y, 3 y, 4y          | Wheeze in last 12 months collected at 1y, 2y, 3y, 4y                  | Wheezing in the last 12 months collected at 4 y       | Allergic rhinitis in the last 12 months collected at 4 y                | Treatment for respiratory or lung problems in the last 12 months collected at 4 y |
| RHEA     | Ever physician diagnosed asthma collected at 4 y                       | Ever wheeze collected at 9m; wheeze in last 12 months collected at 4y | Wheezing in the last 12 months collected at 4 y       | Allergic rhinitis in the last 12 months collected at 4 y                | Treatment for asthma or breathing problems in the last 12 months collected at 4 y |
| ROBBIC   | Ever physician diagnosed asthma collected at 6m, 15m, 3-4 y            | Wheeze in last 12 months collected at 6m, 15m, 3y                     | Wheezing in the last 12 months collected at 3-4 y     | Allergic rhinitis in the last 12 months collected at 3-4 y              | Treatment for asthma or breathing problems in the last 12 months at 3-4 y         |
| SWS      | Ever physician diagnosed asthma collected at 3 y                       | Wheeze in last 12 months collected at 2y, 4y                          | Wheeze in the past 12 months collected at 3 y         | Not collected                                                           | Not collected                                                                     |

**Table E3.Prevalence of baseline early-onset asthma and asthma-related phenotypes by cohort**

|        | Baseline asthma   |             | Baseline wheeze in the last 12 months |             | Early wheeze at 0-2 years |             | Baseline allergic rhinitis in the last 12 months |             | Baseline medication use for asthma/breathing difficulties in the last 12 months |             |
|--------|-------------------|-------------|---------------------------------------|-------------|---------------------------|-------------|--------------------------------------------------|-------------|---------------------------------------------------------------------------------|-------------|
|        | Total n with data | Yes No. (%) | Total n with data                     | Yes No. (%) | Total n with data         | Yes No. (%) | Total n with data                                | Yes No. (%) | Total n with data                                                               | Yes No. (%) |
| ABCD   | NA                | NA          | NA                                    | NA          | 2783                      | 272 (9.8)   | NA                                               | NA          | NA                                                                              | NA          |
| BAMSE  | 2239              | 246 (11.0)  | 2258                                  | 343 (15.2)  | 2265                      | 441 (19.5)  | 2240                                             | 275 (12.3)  | 2249                                                                            | 588 (26.1)  |
| DARC   | NA                | NA          | 348                                   | 51 (14.7)   | 348                       | 60 (17.2)   | 348                                              | 35 (10.1)   | 348                                                                             | 130 (37.4)  |
| EDEN   | 592               | 81 (13.7)   | 560                                   | 60 (10.7)   | 587                       | 83 (14.1)   | 592                                              | 128 (21.6)  | NA                                                                              | NA          |
| GENR   | NA                | NA          | 1072                                  | 109 (10.2)  | 1149                      | 195 (17.0)  | NA                                               | NA          | NA                                                                              | NA          |
| GINI   | 3241              | 106 (3.3)   | 3231                                  | 321 (9.9)   | 3302                      | 362 (11.0)  | 3246                                             | 318 (9.8)   | 3309                                                                            | 54 (1.6)    |
| INMA_M | 249               | 5 (2.0)     | 249                                   | 25 (10.0)   | 249                       | 67 (26.9)   | NA                                               | NA          | NA                                                                              | NA          |
| INMA_V | 426               | 17 (4.0)    | 426                                   | 83 (19.5)   | 426                       | 149 (35.0)  | 425                                              | 14 (3.3)    | 417                                                                             | 69 (16.6)   |
| KOALA  | 1449              | 98 (6.8)    | 1452                                  | 149 (10.3)  | 1467                      | 213 (14.5)  | NA                                               | NA          | 1439                                                                            | 143 (9.9)   |
| LISA   | 1844              | 28 (1.5)    | 1847                                  | 209 (11.3)  | 1873                      | 647 (34.5)  | 1857                                             | 193 (10.4)  | NA                                                                              | NA          |
| MAS    | NA                | NA          | 963                                   | 96 (10.0)   | 966                       | 116 (12.0)  | 963                                              | 125 (13.0)  | NA                                                                              | NA          |
| PIAMA  | 2988              | 217 (7.3)   | 2921                                  | 333 (11.4)  | 2981                      | 512 (17.2)  | 2917                                             | 599 (20.5)  | 2533                                                                            | 355 (12.3)  |
| RHEA   | 500               | 28 (5.6)    | 502                                   | 19 (3.8)    | 486                       | 119 (24.5)  | 500                                              | 112 (22.4)  | 497                                                                             | 298 (60.0)  |
| ROBBIC | 641               | 25 (3.9)    | 641                                   | 98 (15.3)   | 639                       | 178 (27.9)  | 641                                              | 87 (13.6)   | 641                                                                             | 425 (66.3)  |
| SWS    | 1507              | 94 (6.2)    | 1508                                  | 358 (23.7)  | 1509                      | 400 (26.5)  | NA                                               | NA          | NA                                                                              | NA          |

Abbreviations: NA, not available.

**Table E4. Distribution of obese at baseline and incident obesity up to age 8 years  
in a pooled sample of children from 16 European birth cohorts**

|                     | Total at baseline including<br>prevalent obese cases | Obese at<br>baseline | Total at baseline after excluding<br>prevalent obese cases | Obesity incidence by<br>end of follow-up |
|---------------------|------------------------------------------------------|----------------------|------------------------------------------------------------|------------------------------------------|
|                     | N                                                    | Yes<br>No. (%)       |                                                            | Yes<br>No. (%)                           |
| ABCD                | 2872                                                 | 89 (3.1)             | 2783                                                       | 24 (0.9)                                 |
| BAMSE               | 2357                                                 | 89 (3.8)             | 2268                                                       | 60 (2.7)                                 |
| DARC                | 356                                                  | 8 (2.3)              | 348                                                        | 7 (2.0)                                  |
| EDEN                | 598                                                  | 6 (1.0)              | 592                                                        | 10 (1.7)                                 |
| GENR                | 1189                                                 | 20 (1.7)             | 1169                                                       | 10 (0.8)                                 |
| GINIplus            | 3358                                                 | 49 (1.5)             | 3309                                                       | 47 (1.4)                                 |
| INMA_M              | 263                                                  | 14 (5.3)             | 249                                                        | 6 (2.4)                                  |
| INMA_V              | 453                                                  | 27 (6.0)             | 426                                                        | 44 (10.3)                                |
| KOALA               | 1484                                                 | 13 (0.9)             | 1471                                                       | 9 (0.6)                                  |
| LISAplus            | 1903                                                 | 22 (1.2)             | 1881                                                       | 21 (1.1)                                 |
| MAS                 | 987                                                  | 18 (1.8)             | 969                                                        | 26 (2.7)                                 |
| PIAMA               | 3061                                                 | 72 (2.4)             | 2989                                                       | 81 (2.7)                                 |
| RHEA                | 557                                                  | 31 (5.6)             | 526                                                        | 53 (10.1)                                |
| ROBBIC              |                                                      | 53 (7.6)             | 641                                                        | 39 (6.1)                                 |
| SWS                 | 1565                                                 | 56 (3.6)             | 1509                                                       | 46 (3.1)                                 |
| All<br>participants | 21697                                                | 567 (2.6)            | 21130                                                      | 483 (2.3)                                |

**Table E5. Distribution of maternal and child characteristics by cohort**

|          | Child sex (male)  |             | Maternal education (low/medium) |             | Parity (multiparous) |             | Birthweight (g)   |              | Breastfeeding (≥3 months) |             | Parental asthma (yes) |             | Smoking during pregnancy (yes) |             | Passive smoke (yes) |             |
|----------|-------------------|-------------|---------------------------------|-------------|----------------------|-------------|-------------------|--------------|---------------------------|-------------|-----------------------|-------------|--------------------------------|-------------|---------------------|-------------|
|          | Total n with data | Yes No. (%) | Total n with data               | Yes No. (%) | Total n with data    | Yes No. (%) | Total n with data | Median (IQR) | Total n with data         | Yes No. (%) | Total n with data     | Yes No. (%) | Total n with data              | Yes No. (%) | Total n with data   | Yes No. (%) |
| ABCD     | 2783              | 1404 (50.5) | 2773                            | 1293 (46.6) | 2783                 | 1161 (41.7) | 2783              | 3492 (655)   | 2783                      | 1821 (65.4) | 2667                  | 409 (15.3)  | 2783                           | 232 (8.3)   | 2783                | 340 (12.2)  |
| BAMSE    | 2268              | 1153 (50.8) | 2257                            | 1309 (58.0) | 2268                 | 1073 (47.3) | 2251              | 3540 (675)   | 2219                      | 2107 (95.0) | 2255                  | 456 (20.2)  | 2268                           | 272 (12.0)  | 2268                | 319 (14.1)  |
| DARC     | 348               | 174 (50.0)  | 348                             | 267 (76.7)  | 348                  | 188 (54.0)  | 348               | 3594 (700)   | 326                       | 260 (79.8)  | 336                   | 65 (19.3)   | 348                            | 103 (29.6)  | 348                 | 58 (16.7)   |
| EDEN     | 592               | 322 (54.4)  | 587                             | 349 (59.5)  | 592                  | 300 (50.7)  | 591               | 3320 (600)   | 592                       | 290 (49.0)  | 592                   | 101 (17.1)  | 592                            | 102 (17.2)  | 592                 | 251 (42.4)  |
| GENR     | 1169              | 590 (50.5)  | 1162                            | 399 (34.3)  | 1169                 | 481 (41.2)  | 1169              | 3540 (655)   | 882                       | 565 (64.1)  | 962                   | 121 (12.6)  | 1169                           | 263 (22.5)  | 1163                | 270 (23.2)  |
| GINIplus | 3309              | 1670 (50.5) | 3212                            | 1737 (54.1) | 3191                 | 1587 (49.7) | 3263              | 3455 (615)   | 3262                      | 2448 (75.1) | 3208                  | 443 (13.8)  | 3267                           | 430 (13.1)  | 3307                | 825 (25.0)  |
| INMA_M   | 249               | 118 (47.4)  | 237                             | 200 (84.4)  | NA                   | NA          | 249               | 3220 (530)   | 249                       | 150 (60.2)  | 248                   | 25 (10.1)   | 249                            | 86 (34.5)   | 249                 | 158 (63.5)  |
| INMA_V   | 426               | 215 (50.5)  | 426                             | 297 (69.7)  | 426                  | 190 (44.6)  | 426               | 3250 (600)   | 423                       | 227 (53.7)  | 426                   | 57 (13.4)   | 426                            | 95 (22.3)   | 426                 | 224 (52.6)  |
| KOALA    | 1471              | 752 (51.1)  | 1454                            | 677 (46.6)  | 1471                 | 825 (56.1)  | 1471              | 3530 (595)   | 1471                      | 1017 (69.1) | 1452                  | 237 (16.3)  | 1471                           | 79 (5.4)    | 1471                | 287 (19.5)  |
| LISAplus | 1881              | 905 (51.9)  | 1863                            | 808 (43.4)  | 1879                 | 853 (45.4)  | 1881              | 3450 (590)   | 1772                      | 1557 (87.9) | 1811                  | 229 (12.6)  | 1822                           | 256 (14.1)  | 1858                | 476 (25.6)  |
| MAS      | 969               | 508 (52.4)  | NA                              | NA          | 969                  | 392 (40.4)  | 963               | 3400 (590)   | 968                       | 585 (60.4)  | 940                   | 143 (15.2)  | NA                             | NA          | 969                 | 544 (56.2)  |
| PIAMA    | 2989              | 1518 (50.8) | 2975                            | 1877 (63.1) | 2989                 | 1479 (49.5) | 2981              | 3520 (650)   | 2966                      | 1378 (46.5) | 2968                  | 398 (13.4)  | 2972                           | 476 (15.7)  | 2989                | 938 (31.4)  |
| RHEA     | 526               | 286 (54.4)  | 503                             | 323 (64.2)  | 522                  | 284 (54.4)  | 411               | 3200 (620)   | 499                       | 257 (51.5)  | 522                   | 41 (7.9)    | 500                            | 103 (20.6)  | 523                 | 216 (41.3)  |
| ROBBIC   | 641               | 330 (51.5)  | 641                             | 393 (61.3)  | 638                  | 283 (44.4)  | 641               | 3351 (570)   | 639                       | 463 (72.5)  | 639                   | 126 (19.7)  | 636                            | 62 (9.8)    | 641                 | 354 (55.2)  |
| SWS      | 1509              | 786 (52.1)  | 1505                            | 1046 (69.5) | 1509                 | 723 (47.9)  | 1509              | 3470 (646)   | 1456                      | 749 (51.4)  | 1493                  | 556 (37.2)  | 1509                           | 187 (12.4)  | 1509                | 656 (43.5)  |

Abbreviations: NA, not available.

**Table E6. Individual participant meta-analyses results for the association of early-onset asthma and asthma-related phenotypes with incident obesity up to age 8 years after omitting one cohort at a time\***

|                | Baseline asthma   | Baseline wheeze in the last 12 months | Baseline allergic rhinitis in the last 12 months |
|----------------|-------------------|---------------------------------------|--------------------------------------------------|
| Overall        | 1.87 (1.32, 2.64) | 1.38 (1.06, 1.80)                     | 1.35 (1.02, 1.79)                                |
| Cohort omitted |                   |                                       |                                                  |
| ABCD           | NA                | NA                                    | NA                                               |
| BAMSE          | 2.13 (1.46, 3.13) | 1.45 (1.09, 1.93)                     | 1.29 (0.95, 1.76)                                |
| DARC           | NA                | 1.38 (1.05, 1.82)                     | NE                                               |
| EDEN           | 1.82 (1.28, 2.61) | 1.35 (1.03, 1.77)                     | 1.34 (1.01, 1.78)                                |
| GENR           | NA                | 1.39 (1.05, 1.82)                     | NA                                               |
| GINIplus       | 1.86 (1.30, 2.67) | 1.31 (0.98, 1.74)                     | 1.42 (1.07, 1.89)                                |
| INMA_M         | NE                | 1.37 (1.04, 1.80)                     | NA                                               |
| INMA_V         | 1.60 (1.10, 2.33) | 1.37 (1.01, 1.86)                     | 1.32 (0.99, 1.75)                                |
| KOALA          | 1.87 (1.32, 2.66) | 1.32 (1.01, 1.73)                     | NA                                               |
| LISAplus       | NE                | 1.36 (1.02, 1.80)                     | 1.37 (1.03, 1.82)                                |
| MAS            | NA                | 1.41 (1.08, 1.86)                     | 1.38 (1.03, 1.83)                                |
| PIAMA          | 1.85 (1.24, 2.77) | 1.34 (0.98, 1.81)                     | 1.31 (0.94, 1.84)                                |
| RHEA           | 1.92 (1.34, 2.75) | 1.38 (1.04, 1.84)                     | 1.31 (0.96, 1.78)                                |
| ROBBIC         | 1.89 (1.33, 2.71) | 1.47 (1.12, 1.93)                     | 1.43 (1.07, 1.91)                                |
| SWS            | 1.89 (1.31, 2.72) | 1.34 (0.99, 1.83)                     | NA                                               |

Abbreviations: NA, not applicable; NE, cohort-specific estimate not estimable due to no exposed incident obesity cases within the cohort.

\*Hazard ratios (95% CIs) by cohort were obtained by using Cox proportional hazards models adjusted for age at baseline, smoking during pregnancy, passive smoke, parity, maternal education, parental asthma, breastfeeding, & birthweight with sex-specific baseline hazard. Combined estimates were obtained by using a random-effects meta-analysis.

**Table E7. Association of early-onset asthma and asthma-related phenotypes with incident obesity up to age 8 years in a pooled sample of 21130 children from 16 European birth cohorts with additional adjustment for overweight children at baseline**

| Asthma/asthma-related phenotypes                                    | n (%)        | aHR* (95% CI)     |
|---------------------------------------------------------------------|--------------|-------------------|
| Baseline asthma                                                     |              |                   |
| Yes                                                                 | 945 (6.0)    | 1.47 (1.05, 2.08) |
| No                                                                  | 14731 (94.0) | ref               |
| Baseline wheeze in the last 12 months                               |              |                   |
| Yes                                                                 | 2254 (12.5)  | 1.15 (0.89, 1.50) |
| No                                                                  | 15724 (87.5) | ref               |
| Asthma history                                                      |              |                   |
| Active asthma (have baseline asthma and baseline wheeze)            | 543 (3.5)    | 1.75 (1.15, 2.66) |
| Have baseline asthma, but no baseline wheeze                        | 387 (2.5)    | 1.22 (0.69, 2.16) |
| Have no baseline asthma, but have baseline wheeze                   | 1438 (9.3)   | 1.06 (0.76, 1.46) |
| Have no baseline asthma and no baseline wheeze                      | 13084 (84.7) | ref               |
| Early wheeze at 0-2 years of age                                    |              |                   |
| Yes                                                                 | 3814 (18.1)  | 1.11 (0.90, 1.38) |
| No                                                                  | 17216 (81.9) | ref               |
| Wheezing history                                                    |              |                   |
| Persistent wheezing (have early wheeze and baseline wheeze)         | 1133 (6.3)   | 1.28 (0.92, 1.80) |
| Late onset wheezing (have no early wheeze but have baseline wheeze) | 1135 (6.3)   | 1.08 (0.74, 1.57) |
| Transient wheezing (have early wheeze but no baseline wheeze)       | 2355 (13.1)  | 1.00 (0.76, 1.31) |
| Never wheezing (have no early wheeze and no baseline wheeze)        | 13417 (74.4) | ref               |
| Baseline allergic rhinitis in the last 12 months                    |              |                   |
| Yes                                                                 | 1886 (13.7)  | 1.30 (0.99, 1.70) |
| No                                                                  | 11843 (86.3) | ref               |
| Asthma and allergic rhinitis                                        |              |                   |
| Have baseline asthma and allergic rhinitis                          | 241 (2.2)    | 1.41 (0.74, 2.69) |
| Have baseline asthma and no allergic rhinitis                       | 491 (4.5)    | 2.12 (1.36, 3.30) |
| Have no baseline asthma and no allergic rhinitis                    | 10092 (93.2) | ref               |

Abbreviations: aHR, adjusted hazard ratio; ref, reference category.

\*Cox proportional hazards model adjusted for cohort, age at baseline, smoking during pregnancy, passive smoke, parity, maternal education, parental asthma, breastfeeding, birthweight, & overweight status at baseline with sex-specific baseline hazard.



**Table E8. Association of early-onset asthma and asthma-related phenotypes with incident overweight or obesity up to age 8 years in a pooled sample of 19230 children from 16 European birth cohorts among children who were normal weight at baseline**

| Asthma/asthma-related phenotypes                                    | n (%)           | Incident obesity<br>(n=210)<br>aHR* (95% CI) | Incident overweight or obesity<br>(n=1816)<br>aHR* (95% CI) |
|---------------------------------------------------------------------|-----------------|----------------------------------------------|-------------------------------------------------------------|
| Baseline asthma                                                     |                 |                                              |                                                             |
| Yes                                                                 | 830 (5.9)       | 1.25 (0.70, 2.23)                            | 1.10 (0.89, 1.35)                                           |
| No                                                                  | 13334<br>(94.1) | ref                                          | ref                                                         |
| Baseline wheeze in the last 12 months                               |                 |                                              |                                                             |
| Yes                                                                 | 1997 (12.3)     | 1.18 (0.78, 1.78)                            | 1.10 (0.95, 1.27)                                           |
| No                                                                  | 14310<br>(87.8) | ref                                          | ref                                                         |
| Asthma history                                                      |                 |                                              |                                                             |
| Active asthma (have baseline asthma and baseline wheeze)            | 468 (3.4)       | 1.40 (0.67, 2.89)                            | 1.04 (0.78, 1.37)                                           |
| Have baseline asthma, but no baseline wheeze                        | 349 (2.5)       | 1.18 (0.48, 2.92)                            | 1.24 (0.92, 1.68)                                           |
| Have no baseline asthma, but have baseline wheeze                   | 1277 (9.2)      | 1.22 (0.75, 1.98)                            | 1.16 (0.97, 1.38)                                           |
| Have no baseline asthma and no baseline wheeze                      | 11862<br>(85.0) | ref                                          | ref                                                         |
| Early wheeze at 0-2 years of age                                    |                 |                                              |                                                             |
| Yes                                                                 | 3374 (17.6)     | 1.22 (0.88, 1.69)                            | 1.07 (0.95, 1.20)                                           |
| No                                                                  | 15768<br>(82.4) | ref                                          | ref                                                         |
| Wheezing history                                                    |                 |                                              |                                                             |
| Persistent wheezing (have early wheeze and baseline wheeze)         | 980 (6.0)       | 1.30 (0.75, 2.24)                            | 1.05 (0.85, 1.28)                                           |
| Late onset wheezing (have no early wheeze but have baseline wheeze) | 1030 (6.3)      | 1.22 (0.70, 2.13)                            | 1.18 (0.97, 1.42)                                           |
| Transient wheezing (have early wheeze but no baseline wheeze)       | 2105 (12.9)     | 1.22 (0.82, 1.81)                            | 1.11 (0.96, 1.28)                                           |
| Never wheezing (have no early wheeze and no baseline wheeze)        | 12254<br>(74.9) | ref                                          | ref                                                         |
| Baseline allergic rhinitis in the last 12 months                    |                 |                                              |                                                             |
| Yes                                                                 | 1700 (13.7)     | 1.45 (0.98, 2.14)                            | 0.98 (0.84, 1.14)                                           |
| No                                                                  | 10727<br>(86.3) | ref                                          | ref                                                         |
| Asthma and allergic rhinitis                                        |                 |                                              |                                                             |
| Have baseline asthma and allergic rhinitis                          | 209 (2.1)       | 1.45 (0.65, 3.11)                            | 0.98 (0.65, 1.48)                                           |
| Have baseline asthma and no allergic rhinitis                       | 434 (4.5)       | 1.43 (0.65, 3.11)                            | 1.24 (0.96, 1.62)                                           |
| Have no baseline asthma and no allergic rhinitis                    | 9114 (93.4)     | ref                                          | ref                                                         |

Abbreviations: aHR, adjusted hazard ratio; ref, reference category.

\*Cox proportional hazards model adjusted for cohort, age at baseline, smoking during pregnancy, passive smoke, parity, maternal education, parental asthma, breastfeeding, & birthweight with sex-specific baseline hazard.

**Table E9. Association of early-onset asthma and asthma-related phenotypes with incident obesity up to age 8 years in a pooled sample of 21130 children from 16 European birth cohorts with additional adjustment for baseline BMI**

| Asthma/asthma-related phenotypes                                    | n (%)        | aHR* (95% CI)     |
|---------------------------------------------------------------------|--------------|-------------------|
| Baseline asthma                                                     |              |                   |
| Yes                                                                 | 945 (6.0)    | 1.32 (0.93, 1.86) |
| No                                                                  | 14731 (94.0) | ref               |
| Baseline wheeze in the last 12 months                               |              |                   |
| Yes                                                                 | 2254 (12.5)  | 1.09 (0.84, 1.41) |
| No                                                                  | 15724 (87.5) | ref               |
| Asthma history                                                      |              |                   |
| Active asthma (have baseline asthma and baseline wheeze)            | 543 (3.5)    | 1.60 (1.05, 2.43) |
| Have baseline asthma, but no baseline wheeze                        | 387 (2.5)    | 1.05 (0.59, 1.86) |
| Have no baseline asthma, but have baseline wheeze                   | 1438 (9.3)   | 1.00 (0.72, 1.38) |
| Have no baseline asthma and no baseline wheeze                      | 13084 (84.7) | ref               |
| Early wheeze at 0-2 years of age                                    |              |                   |
| Yes                                                                 | 3814 (18.1)  | 1.03 (0.84, 1.29) |
| No                                                                  | 17216 (81.9) | ref               |
| Wheezing history                                                    |              |                   |
| Persistent wheezing (have early wheeze and baseline wheeze)         | 1133 (6.3)   | 1.15 (0.82, 1.60) |
| Late onset wheezing (have no early wheeze but have baseline wheeze) | 1135 (6.3)   | 1.06 (0.73, 1.54) |
| Transient wheezing (have early wheeze but no baseline wheeze)       | 2355 (13.1)  | 0.95 (0.73, 1.25) |
| Never wheezing (have no early wheeze and no baseline wheeze)        | 13417 (74.4) | ref               |
| Baseline allergic rhinitis in the last 12 months                    |              |                   |
| Yes                                                                 | 1886 (13.7)  | 1.19 (0.90, 1.56) |
| No                                                                  | 11843 (86.3) | ref               |
| Asthma and allergic rhinitis                                        |              |                   |
| Have baseline asthma and allergic rhinitis                          | 241 (2.2)    | 1.42 (0.74, 2.73) |
| Have baseline asthma and no allergic rhinitis                       | 491 (4.5)    | 1.71 (1.10, 2.66) |
| Have no baseline asthma and no allergic rhinitis                    | 10092 (93.2) | ref               |

Abbreviations: aHR, adjusted hazard ratio; ref, reference category.

\*Cox proportional hazards model adjusted for cohort, age at baseline, smoking during pregnancy, passive smoke, parity, maternal education, parental asthma, breastfeeding, birthweight & baseline BMI with sex-specific baseline hazard.
